# Supplementary material for: Towards Sophisticated 3D Interphase Modelling of Advanced Bionanocomposites via Atomic Force Microscopy
Source: Hindawi journal article supplement (doi:10.1155/2020/4526108), 2020-08-04
Supplement: f1 [file 4526108.f1.docx]

**Towards Sophisticated 3D Interphase Modelling of Advanced Bionanocomposites via Atomic Force Microscopy**

Mohanad Mousa 1, 2 and Yu Dong1,*

*1School of Civil and Mechanical Engineering, Curtin University, GPO Box U1987, Perth, WA 6845, Australia.*

*2Shatrah Technical Institute, Southern Technical University, Basra, Iraq*

Correspondence should be addressed to Yu Dong; [y.dong@curtin.edu.au](mailto:y.dong@curtin.edu.au)

**PVA/HNT Bionanocomposite Films**

Real HNTs can possess more irregular particle shapes despite their typical hollow tubular structures when well dispersed. Non-uniform interphase thickness has been identified in Fig. 5a between HNTs and PVA matrices in PVA/HNT bionanocomposites. In order to determine the 3D interphase dimensions of PVA/HNT bionanocomposites, the following procedure was implemented in a step-by-step manner:

- Since actual embedded HNTs in PVA/HNT bionanocomposites may not be in perfectly tubular shape, the HNT diameter may not be consistent accordingly, which thus is categorised as HNT diameters along the transverse plane section (*DT*iHNT) and the longitudinal plane section (*DL*jHNT) where *i*=1, 2,3…. and *j* =1,2,3…., respectively. The data collection of overall HNT diameters (*D*HNT) reported in Fig. 5a is based on both *DT*HNT and *DT*LHNT data. When scanned transversely at a size interval of 10 nm depicted in Fig. S1, *W*i Interphase in PVA/ HNT bionanocomposites can be determined as


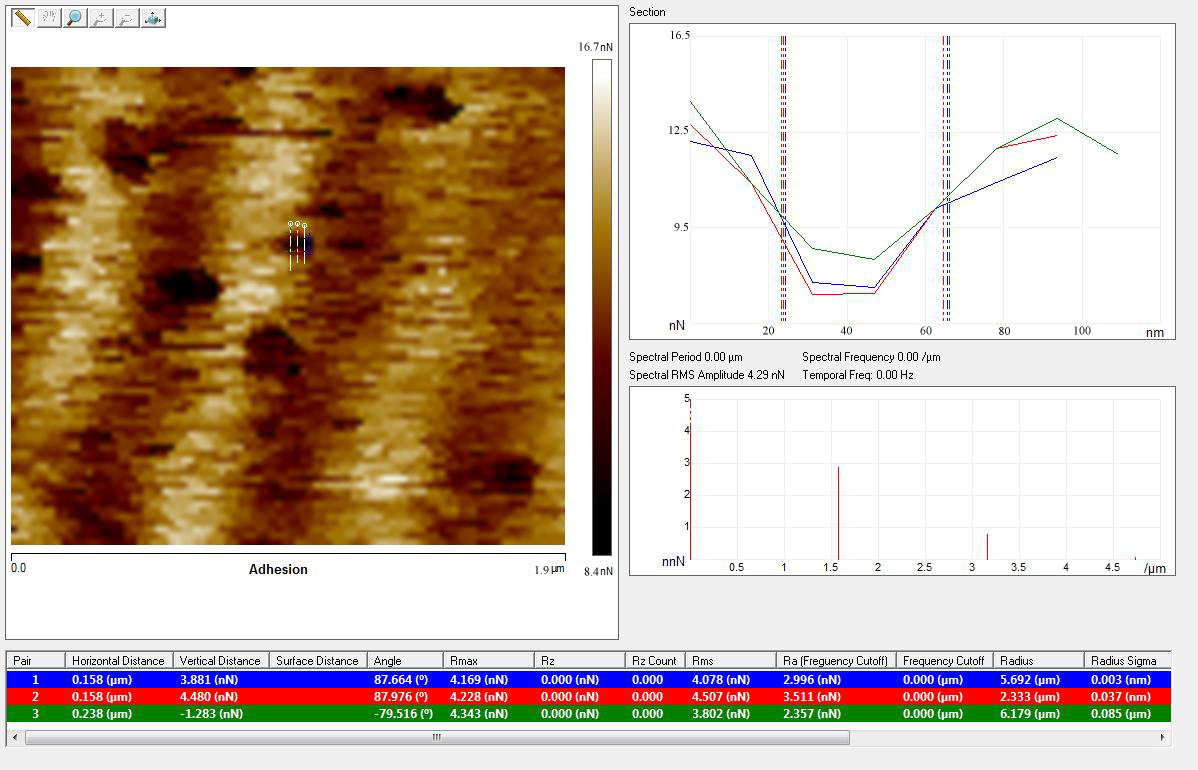

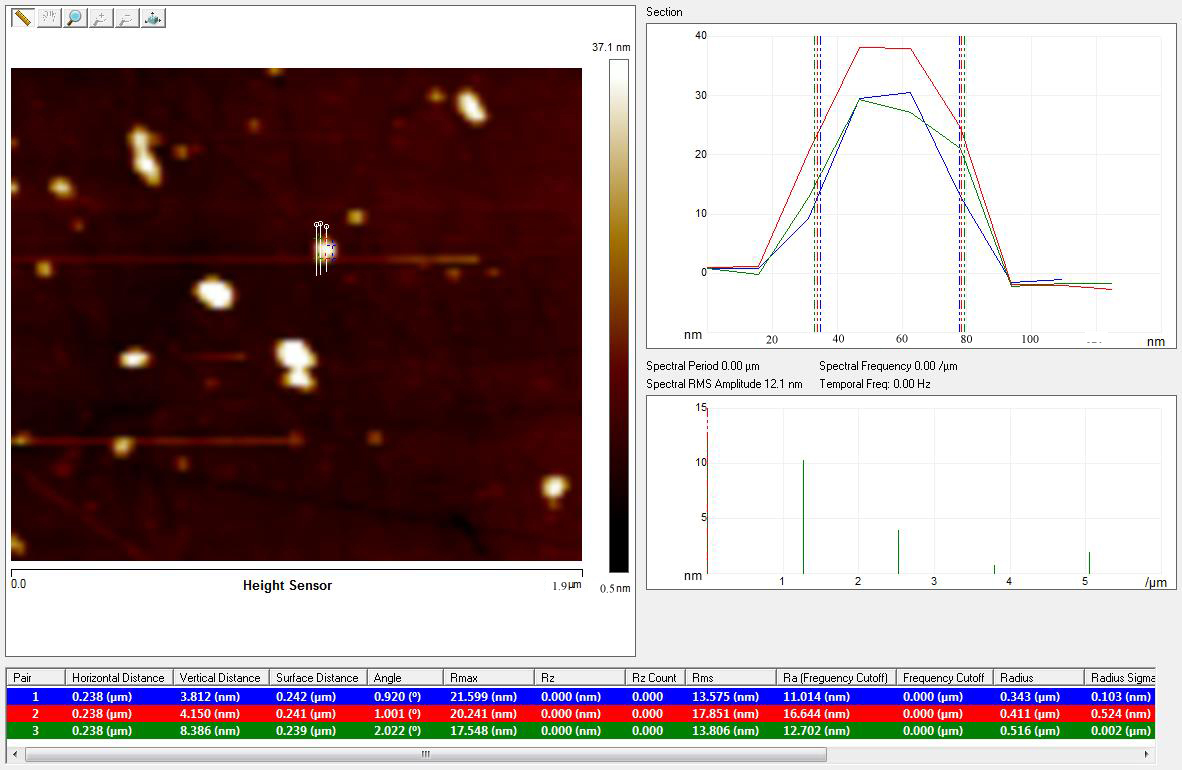


W3

W3

W2

W2

W1

W1

PVA matrices

PVA matrices

Interphase

HNT

10 nm

HNT

Interphase

10 nm

W1

W2

W3

W3

W2

W1

**Height profile**

**PVA**

**HNT**

**PVA**

**Interphase**

**HNT**

**Interphase**

**Adhesion profile**

*DT*i HNT

*DT*i HNT

*DL*i HNT

*t*Wi1

*t*Wi2

A

B

Interphase

10 nm

*i*th *plane*

**(a)**

**(b)**

**(c)**

**Fig. S1.** (a) Schematic diagrams of cross-sectional scanning of PVA/HNT interphases in PVA/HNT bionanocomposites along the transverse plane direction with (b) height profile and (c) adhesion profile.

*W*i Interphase = *DT*iHNT + *t* Wi1 + *t* Wi2 (S.1)

*L*j Interphase and *H*k Interphase of PVA/ HNT phases in PVA/HNT bionanocompositeswere measured by scanning along the *j*th longitudinal plane (size interval: 10 nm) and the *k*th height plane (*k* =1, 2, 3….) with a size interval of 4 nm, as depicted in Figs. S2a and b, respectively. The geometric equations can be established as below

*L*j Interphase = *L*jHNT + *t* Lj1 + *t* Lj2 (S.2)

*H*k Interphase = *DL*iHNT + *t* Hk1 + *t* Hk2 (S.3)

|  |
| --- |
| *Lj* HNT  *L*j Interphase  A  B  A  B  Interphases  *t*Lj2  *t*Lj1  HNT 10nm  *t*Lj2  *t*Lj2  *D*Lj HNT  *H*j Interphase  *i*th *plane*  *k*th *plane*  **(b)**  **(a)**  HNT  Interphase  4 nm |

Fig. S2. Schematic diagrams of cross-sectional scanning of PVA/HNT interphases in PVA/HNT bionanocomposites along (a) longitudinal plane direction in a top view and (b) height plane direction in a side view.

- Next step is to determine interphase dimensions of PVA/HNT phases in PVA/HNT bionanocomposites to calculate ,, and as follows:

*a1, b1, c1, d1, a2, b2, c2, d2, a3, b3, c3, d3* and *a4, b4, c4, d4* are constants determined by curving fitting. For example, the constants of , , andwere detected to be 0.4932, 0.4135, 0.6613, and 0.7621, respectively, as depicted in Fig. S3 by fitting Eq. (S.4) with surface area of outer interface (*SAouter interface*)f obtained from the AFM data.

| 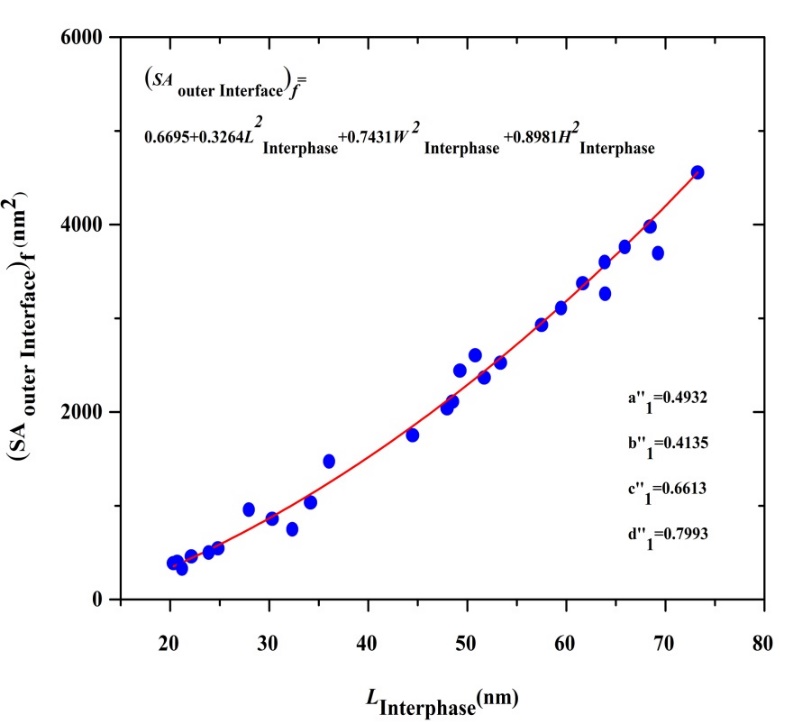 |
| --- |

**Fig. S3** Relationship between surface area of outer interface (*SA*outer interface) and interphase length(*L*Interphase) for PVA/HNT phases in PVA/HNT bionanocomposites.

- At the third step, interphase volume for PVA/HNT phases in PVA/HNT bionanocomposites was calculated in case of fully and partially embedded HNTs by rewriting Eqs. (S.4)-(S.7) in the following:

*e1, f1, e2, f2, e3, f3* and *e4, f4* are constants determined by curving fitting. For instance, the constants of and were calculated to be 0.4432 and 0.4726, respectively with R2= ~0.95, as shown in Fig. S4.

| 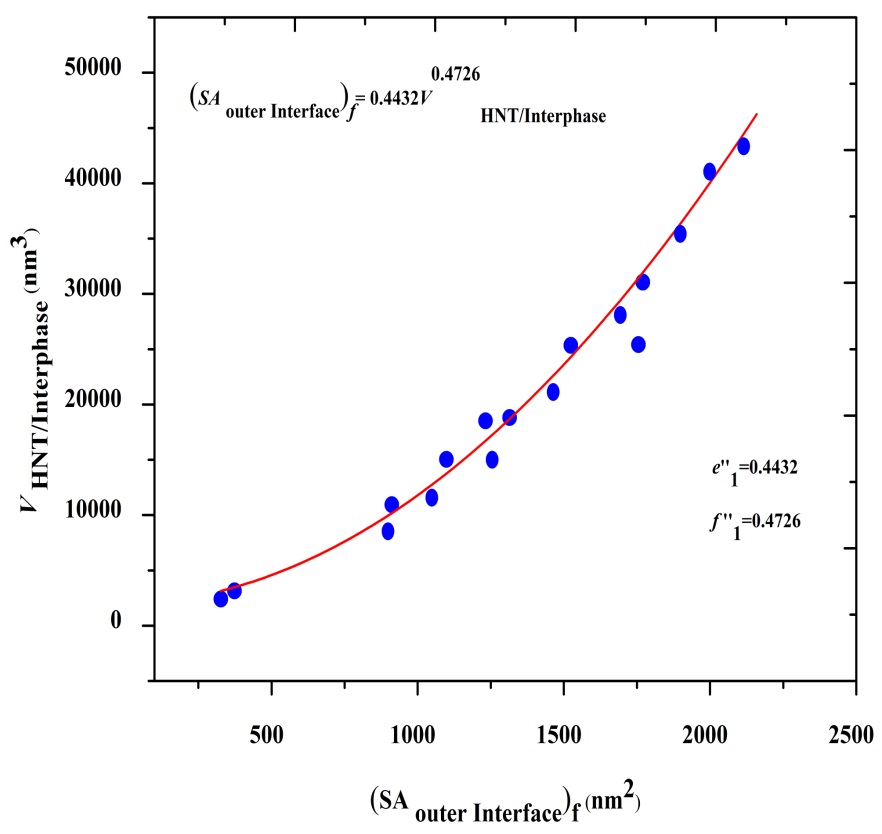 |
| --- |

Fig. S4 Relationship between surface area of outer interface (SAouter interface) and HNT/interphase volume (*V*HNT/Interphase) in PVA/HNT bionanocomposites.

- Finally, *V*Interphase was estimiated in case of fully or partially embedded HNTs in PVA/ HNT bionanocomposites below:

(*V* Interphase) f =*V*HNT/Interphase- *V*HNT  (S12)

(*V* Interphase) p =*V*HNT/Interphase-effective- *V*HNT effective  (S13)

## PVA/Cloisite 30B Clay Bionanocomposite Films

Despite a general concept of platelet-like structures for Cloisite 30B clays, morphological structures of Cloisite 30B clays within PVA matrices under AFM reveal that their shapes can be more complex and irregular. Moreover, PVA/Cloisite 30B clay interphase has clearly demonstrated non-uniform thickness illustrated in Fig. 5e. In this case, a similar approach to detect 3D interphase dimensions in PVA/Cloisite 30B clay bionanocomposites is elaborated as follows:

- First of all, PVA/ Cloisite 30B clay phases were scanned transversely in Figure S5 in order to detect *W*iInterphase. The scanning process was carried out at a size interval of 10 nm. Interphase width *W*iInterphase along the *i*th transverse plane (*i* =1, 2, 3….) can be rewritten according to Eq. (S.1) as below:

*W*i Interphase = *W*iCloisite30B + *t* Wi1 + *t* Wi2 (S.14)

*L*j Interphase and *H*k Interphase in case of PVA/Cloisite 30B nanocomposites were determined by scanned PVA/Cloisite 30B clay phases along the *j*th longitudinal plane (*j* =1, 2, 3….) and along the *k*th height plane (*k* =1, 2, 3….) at the size intervals of 10 and 4 nm, respectively, as presented in Figs. S6a and b. Accordingly, *L*j Interphase and *H*k Interphase can be rewritten as

*L*j Interphase = *L*jCloisite30B + *t* Lj1 + *t* Lj2 (S.15)

*H*k Interphase = *H*kCloisite30B + *t* Hk1 + *t* Hk2 (S.16)

*W* i Cloisite 30B

*t*Wi1

*t*Wi2

A

B

Interphases

10 nm

*i*th *plane*

Cloisite 30B


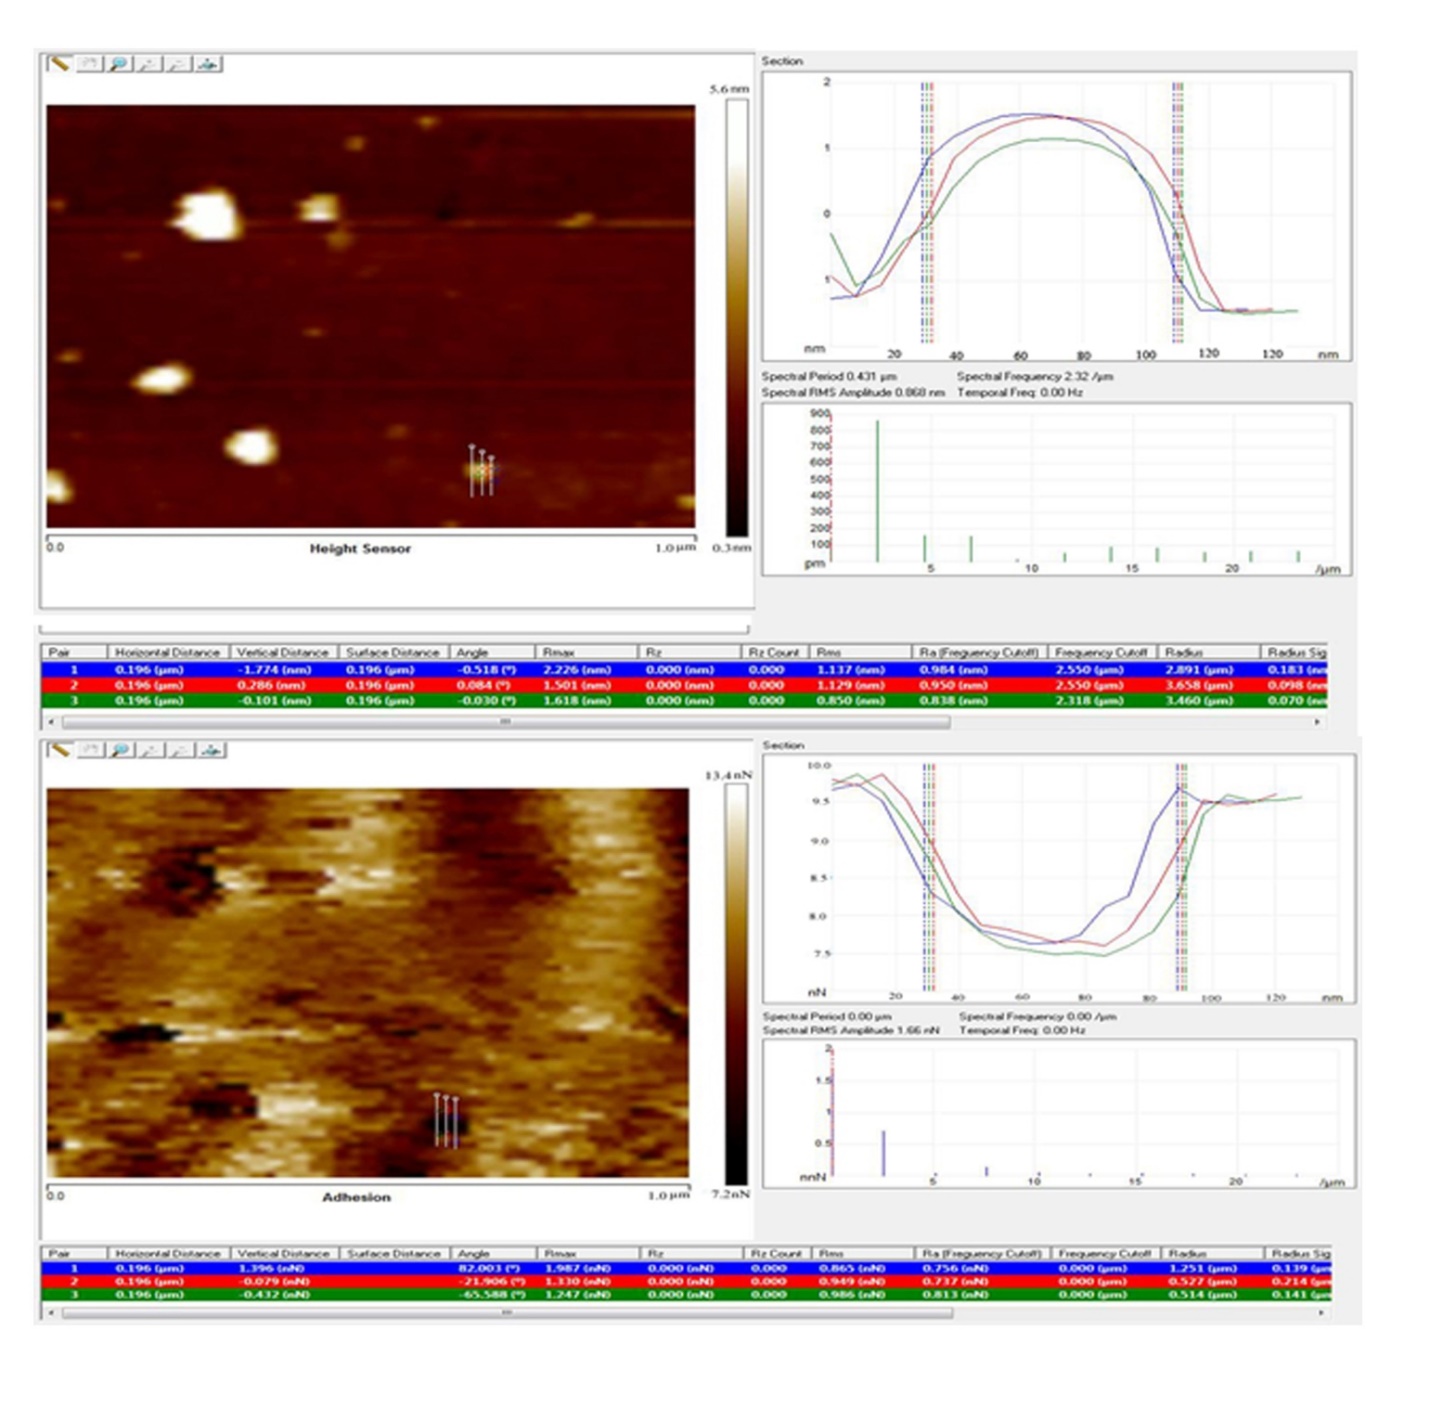


W3

W3

W2

W2

W1

W1

PVA matrices

PVA matrices

Interphase

Cloisite 30B

10 nm

Cloisite 30B

Interphase

10 nm

W1

W2

W3

W3

W2

W1

**Height profile**

**PVA**

**Cloisite30B**

**PVA**

**Interphase**

**Cloisite30B**

**Interphase**

**Adhesion profile**

**Fig. S5.** (a) Schematic diagrams of cross-sectional scanning of PVA/Cloisite 30B interphases in PVA/ Cloisite 30B bionanocomposites along the transverse plane direction with (b) height profile and (c) adhesion profile.

| **(c)** B  **(b)** B |
| --- |
| (a) B  A  B  *K*th plane  B  4 nm  *H*k Cloisite30B  *H*k Interphase  *t*Hk1  *t*Hk2  Interphase  Cloisite 30B  *t*Lj2  *t*Lj1  *L*jCloisite30B2  *L*jInterphase2  A  B  *j*th plane  B  Cloisite 30B  10 nm  Interphase  **(a)**  **(b)** |

Fig. S6. Schematic diagrams of cross-sectional scanning of PVA/ Cloisite 30B interphases in PVA/ Cloisite 30B bionanocomposites along (a) longitudinal plane direction in a top view and (b) height plane direction in a side view.

- Secondly, , , and in PVA/Cloisite 30B phases can be determined with the consideration of interphase dimensions in a similar manner as given by:

*a1, b1, c1, d1, a2, b2, c2, d2, a3, b3, c3, d3* and *a4, b4, c4, d4* are constants determined via curving fitting. For instance, the constants of , , andwere determined to be 0.6695, 0.3264, 0.7431, and 0.8981, respectively, as shown in Fig. S7 by fitting Eq. (S.17) with surface area of outer interface (*SA*outer interface)f obtained from the AFM measurements.

| 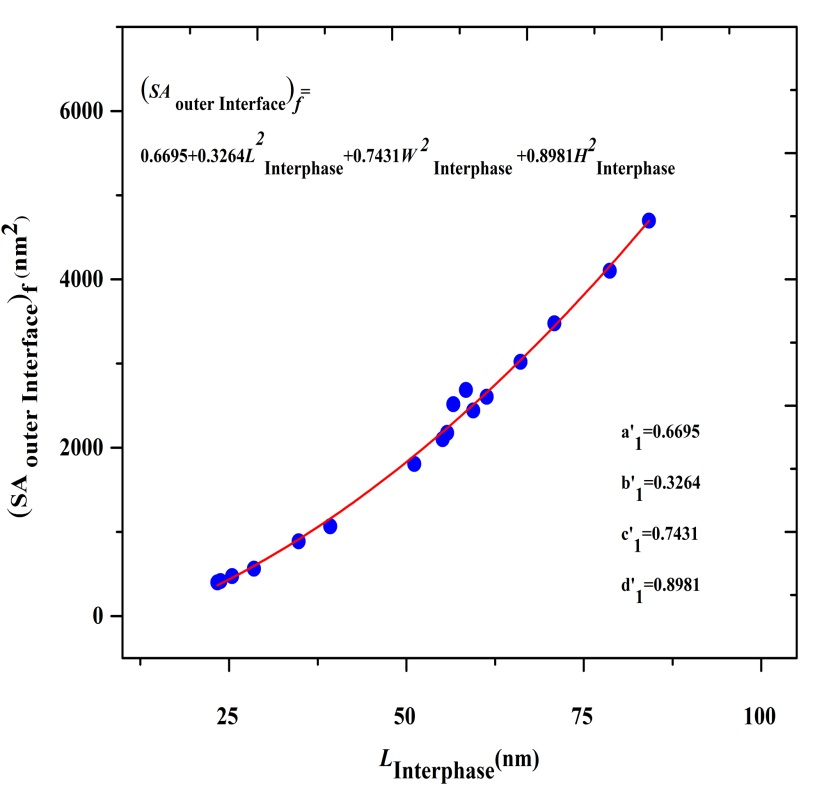 |
| --- |

**Fig. S7** Relationship between surface area of outer interface (*SA*outer interface) and interphase length(*L*Interphase) in PVA/Cloisite 30B clay bionanocomposites.

- Thirdly, the interphase volume for PVA/Cloisite 30B phases was calculated in case of fully and partially embedded Cloisite 30B clays in PVA/Cloisite 30B clay bionanocmposites to yield:

*e1, f1, e2, f2, e3, f3* and *e4, f4* are constants determined using curving fitting. For instance, the constants of and were calculated to be 0.4015 and 0.4116, respectively with R2= ~0.96, as shown in Fig. S8.

| 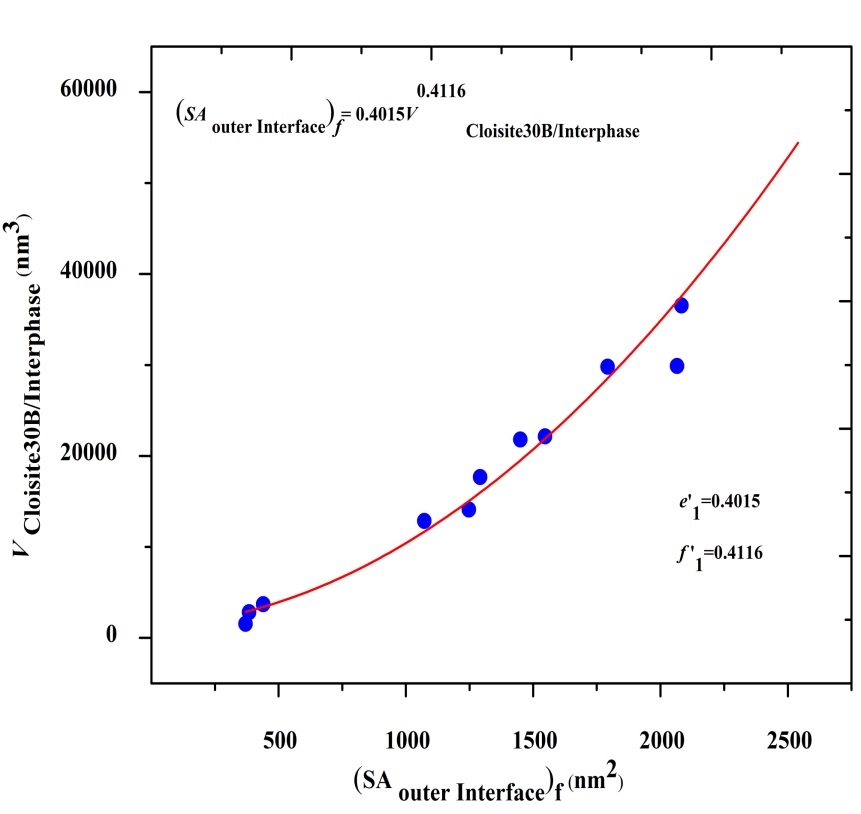 |
| --- |

Fig. S8 Relationship between surface area of outer interface (SAouter interface) and Cloisite 30B /interphase volume (*V*Cloisite30B/Interphase) in PVA/Cloisite 30B clay bionanocomposites.

- Finally, *V*Interphase was calculated with respect to fully or partially embedded Cloisite 30B clays in PVA/ Cloisite30B bionanocomposites given by

(*V* Interphase) f =*V*Cloisite30B/Interphase- *V*Cloisite30B (S.25)

(*V* Interphase) p =*V*Cloisite30B/Interphase-effective- *V*Cloisite30B effective (S.26)

**Elastic Modulus Profile**


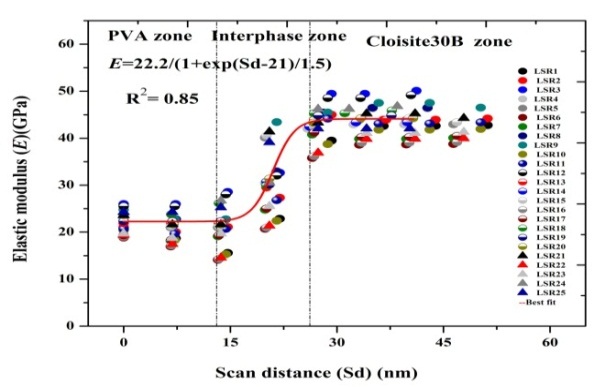

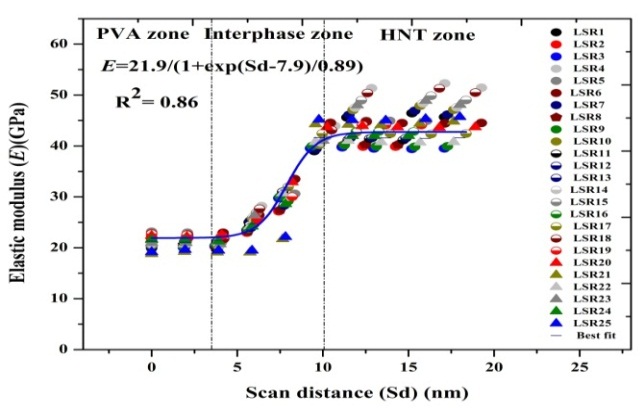


**(a)**

**(b)**

**Fig. S9** Elastic modulus profiles based on typical datasets of 25 line scan regions (LSRs) with best curve fitting in terms of scan distance Sd: (a) PVA/ 3 wt% HNT bionanocomposites and (b) PVA/3 wt% Cloisite 30B clay bionanocomposites.
